# Supplementary material for: Inhibiting the Appearance of Green Emission in Mixed Lead Halide Perovskite Nanocrystals for Pure Red Emission
Source: PubMed Central journal article supplement (PMC11450971; doi:10.1021/acs.nanolett.4c01565), 2024-09-23
Supplement: nl4c01565_si_001.pdf [file nl4c01565_si_001.pdf]

# Inhibiting the Appearance of Green emission in Mixed Lead halide Perovskite Nanocrystals for Pure Red Emission

Mutibah Alanazi<sup>1</sup>, Ashley R. Marshall<sup>1,2</sup>, Yincheng Liu<sup>1,3</sup>, Jinwoo Kim<sup>1</sup>, Shaoni Kar<sup>1,2</sup>, Henry J. Snaith<sup>1</sup>, Robert A. Taylor<sup>1</sup>, and Tristan Farrow<sup>\*4,1</sup>

<sup>1</sup>Clarendon Laboratory, Department of Physics, University of Oxford, Parks Road, Oxford, OX1 3PU, U.K.

<sup>2</sup>Helio Display Materials Ltd., Wood Centre for Innovation, Oxford, OX3 8SB

<sup>3</sup>Institute of Materials Research and Engineering, Agency for Science, Technology and Research (A\*STAR), 2 Fusionopolis Way, Singapore 138634, Singapore

<sup>4</sup>NEOM Education, Research and Innovation Foundation, and NEOM University, Tabuk 49643-9136, Saudi Arabia

\*Corresponding authors: tristan.farrow@cantab.net

## Experimental Methods

### Synthesis

**Nanocrystal Synthesis:** PbX<sub>2</sub> powder (0.2 mmol), CsX powder (0.2 mmol), OA (0.5 mL), OAm (0.25 mL) and DMAI (for the A-site modified NCs) were added to 5 mL of dimethylacetamide (DMAc) and stirred to dissolve for 60 mins at room temperature. A portion (3 mL) of the obtained mixture was swiftly injected into 30 mL chlorobenzene or chloroform under vigorous stirring. After stirring, the resulting solution was mixed with methyl acetate in a 1:2 ratio (v/v) and centrifuged for 5 min at 7500 revolutions per minute (rpm). After centrifugation, the supernatant was discarded, and the precipitate was dispersed in hexane. Stable CsPbI<sub>2</sub>Br NC ink (~10 mg mL<sup>-1</sup>) was obtained by removing larger particles after centrifuging the crude dispersion for 5 min at 3000 rpm. Further washing (repetition of fast and slow centrifugation steps) can be done for device application.

**Film Fabrication (solution processing):** The ITO substrates underwent a cleaning process involving sequential sonication in DECON-90, DI water, acetone, and IPA for a duration of 15 minutes each. Following that, the substrates were subjected to UV-ozone treatment for a further 15 minutes. The films utilized for fundamental characterisation and devices were fabricated using the spin-coating technique on ITO/PEDOT:PSS substrates. The PEDOT:PSS solution was subjected to a spin-coating process in ambient conditions, with a rotation speed of 5000 rpm for a duration of 40 seconds. Subsequently, the coated film was subjected to annealing at a temperature of 150 °C for a period of 12 minutes. Afterwards, the specimen was transferred to the glovebox antechamber and left to undergo a drying process for a duration of 20 minutes. Then, NC ink was spin-coated for 40 seconds at 1500 rpm in the glovebox. Any residual solvent was evaporated at 50 °C for a duration of 10 minutes.

### Optical Characterization

**Photoluminescence spectroscopy:** The substrate was mounted in a Janis continuous-flow helium cryostat and the temperature was varied between 4.2 K and room temperature by a Lakeshore 331 temperature controller. Optical characterization was conducted using a confocal micro-photoluminescence set-up. The pump was a continuous wave wavelength laser source (405 nm) and a pulsed variable-wavelength laser source (NTK SuperK Extreme) operating at a maximum frequency of 78 MHz. A 100× magnification apochromatic objective was used in the confocal set-up to focus the pump beam to a spot size of ~1 μm<sup>2</sup> and to collect the luminescence. The spectra data of PL spectroscopy was collected using a SpectraPro HRS spectrometer.

**Time Resolved Photoluminescence (TRPL) spectroscopy:** TRPL measurements were carried out with a time-correlated single photon counting system (PicoHarp 300) coupled with 2 single photon avalanche diodes (MPD PDM) and the time constants were determined using EasyTau.

**UV-Vis absorption :** Separately, absorbance spectra were measured with a Varian Cary 300 Bio UV-Visible spectrophotometer with a 50×50 mm reflective neutral density filters with an optical density of 3.0 (made out of UV fused silica).

**4.2.4 X-ray diffraction spectroscopy:** XRD diffractograms were obtained using a Panalytical X'Pert Pro X-ray diffractometer with a Cu-alpha source ( $\lambda = 1.54 \text{ \AA}$ ).

**Transmission Electron Microscope (TEM):** PNC solutions (~50 mg/mL) were diluted to about 10 mg/mL (as indicated by their optical densities measured on a UV-visible spectrometer) in 9:1 volume ratio of toluene: hexane solvent. This was then drop cast onto a carbon-coated copper TEM mesh-grid and the samples left to dry in the glovebox antechamber for about an hour. The TEM imaging was then done on a JEOL JEM-2100 microscope operating an LaB6 source and equipped with

an Oxford instrument 80 mm thin window EDS detector and a Gatan Orius CCD camera. The ImageJ software was using to analysis the crystal Size.

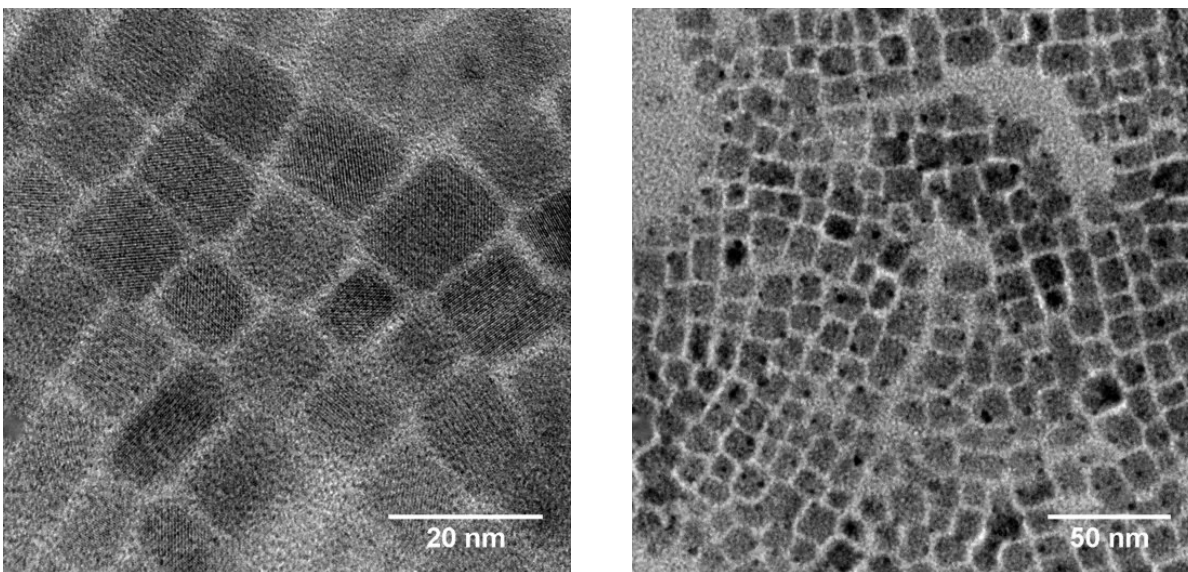

**Figure S1.** Transmission electron microscopy (TEM) images depicting nanocrystals composed of CsPbI<sub>2</sub>Br.

### The photo-oxidation mechanism of CsPbI<sub>2</sub>Br nanocrystals and thin films.

The absence of a green glow in pristine thin films is due to the accumulation of Pb<sup>0</sup> and I<sub>3</sub><sup>-</sup> defects, which increase the lattice energy of pristine thin films, and then diffuse to grain boundaries, forming an I-rich phase due to the presence of multiple surface defects in the thin film compared to nanocrystals (e.g. dangling bonds and uncoordinated (Pb<sup>2+</sup> ions). This can further refer to the fact that the diffusion of both Pb<sup>0</sup> and I<sub>3</sub><sup>-</sup> defects in thin films has a higher propensity to migrate from the bulk to the surfaces of grains and grain boundaries along a vertical pathway than pristine nanocrystals. The inter-diffusion rates for this migration range approximately between 10<sup>19</sup> to 10<sup>20</sup> m<sup>2</sup>s<sup>-1</sup>. In specific, upon prolonged illumination, the thin films decompose into CsI, PbI<sub>2</sub>, and PbBr<sub>2</sub> which can passivate defects and grain boundaries to suppress the non-radiative recombination<sup>2</sup>. Mobile interstitial iodine (I<sup>0</sup>) is attracted by charge carriers accumulated at low energy regions (I-rich domains), whereas the (Br<sub>x</sub><sup>-</sup>) and (I<sup>0</sup>/I<sup>-</sup>) interdiffuse to reduce lattice strain. In this regard, we deduce that the band gap difference between I-rich and Br-rich areas determines the threshold size or the intensity that causes phase segregation. In addition, the lattice strain determines the preferential direction for inter-diffusion of both charge carriers and the iodine mobility, which are responsible for final halide distribution.

| The activation energy (E <sub>a</sub> ) measured in this work           |                                   |                                        |
|-------------------------------------------------------------------------|-----------------------------------|----------------------------------------|
|                                                                         | CsPbBrI <sub>2</sub> nanocrystals | CsPbBrI <sub>2</sub> thin films        |
| Pristine Without COC                                                    | 20.6 meV                          | 20.8 meV <sup>4</sup>                  |
| Encapsulated With COC                                                   | 39.3 meV                          | 29 meV <sup>4</sup>                    |
| The activation energy (E <sub>a</sub> ) of various lead Halide Material |                                   |                                        |
|                                                                         | Process                           | The activation energy(E <sub>a</sub> ) |
| CsPb(I <sub>0.5</sub> Br <sub>0.5</sub> ) <sub>3</sub> Colloidal NCs    | Photo-decomposition               | 62 kJ/mol <sup>5</sup>                 |
| CsPb(Cl <sub>(1-x)</sub> Br <sub>x</sub> ) <sub>3</sub> Colloidal NCs   | Halide Exchange                   | 63 kJ/mol <sup>6</sup>                 |
| PbI <sub>2</sub> thin film                                              | Photo-decomposition               | 16 kJ/mol <sup>7</sup>                 |

**Table 1.** The activation energy of pristine CsPbI<sub>2</sub>Br and encapsulated CsPbI<sub>2</sub>Br nanocrystals and films compared to the previous activation energy for various mixed halide compositions.

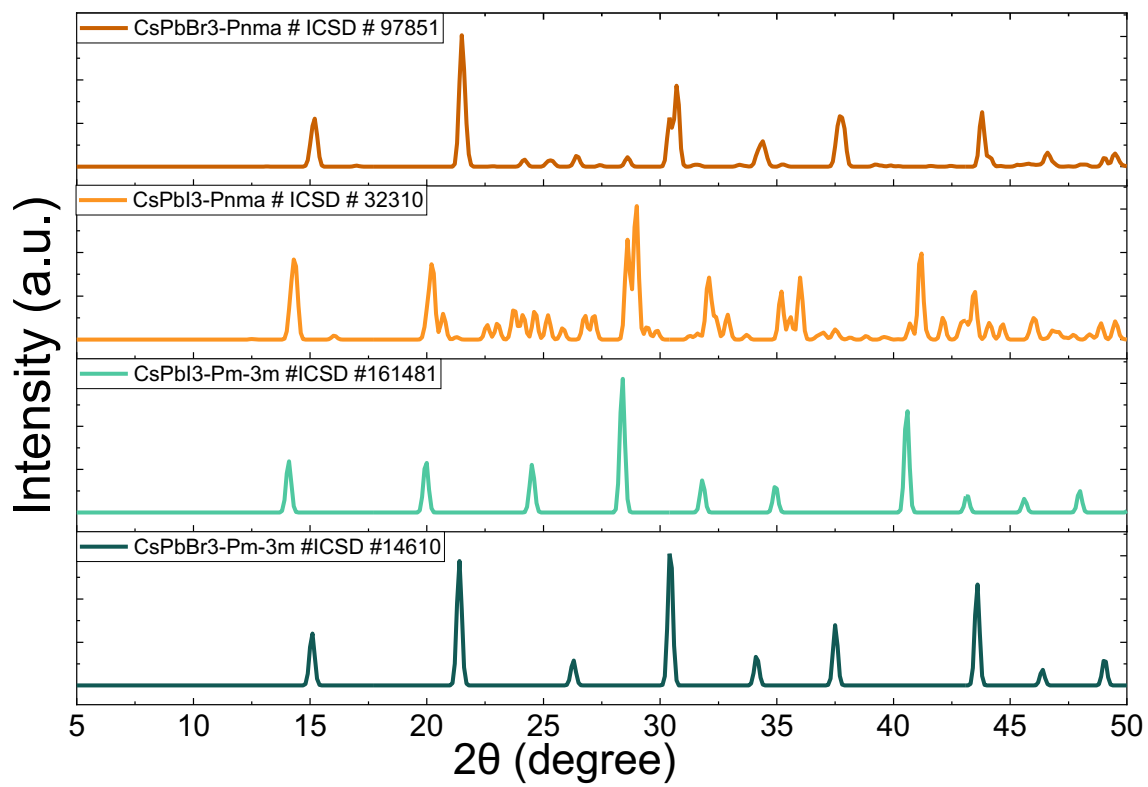

**Figure S2.** The reference patterns of the orthorhombic, cubic, and tetragonal phases of CsPbBr<sub>3</sub> and CsPbI<sub>3</sub> obtained in the Inorganic Crystal Structure Database (ICSD).

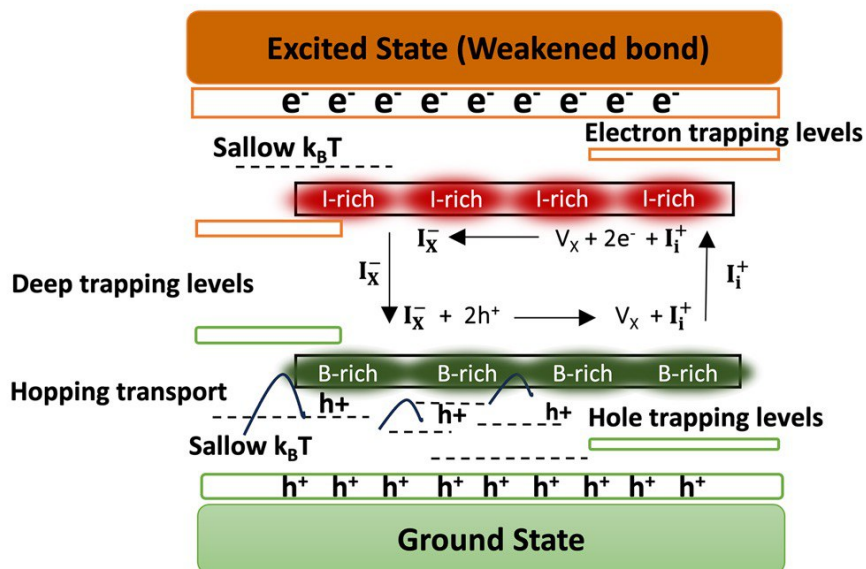

**Figure S3.** Schematic illustrating the photoinduced halide oxidation mechanism for mixed halide perovskites in the form of CsPbI<sub>2</sub>Br nanocrystals and thin films. The photogenerated holes ( $2 h^+$ ) oxidize the lattice iodide ions ( $I_x^-$ ), leading to the formation of iodine ( $I_2$ ) and / or triiodide ( $I_3^-$ ), either in the bulk ( $I^*$ ) or at surfaces ( $I^0$ ).<sup>3</sup> If it forms in bulk, the ( $I_2$ ) migrate faster and are then expelled from the lattice, where uncoordinated Pb<sup>2+</sup> and Cs<sup>+</sup> ions accumulate at the nanocrystal surface. Meanwhile, the lattice bromine ions ( $Br_x^-$ ) drift or diffuse into the Br-rich region and reconstruct the CsPbBr<sub>3</sub> instead of photo-decomposition due to a higher oxidation potential than for the lattice iodide ( $I_x^-$ ).

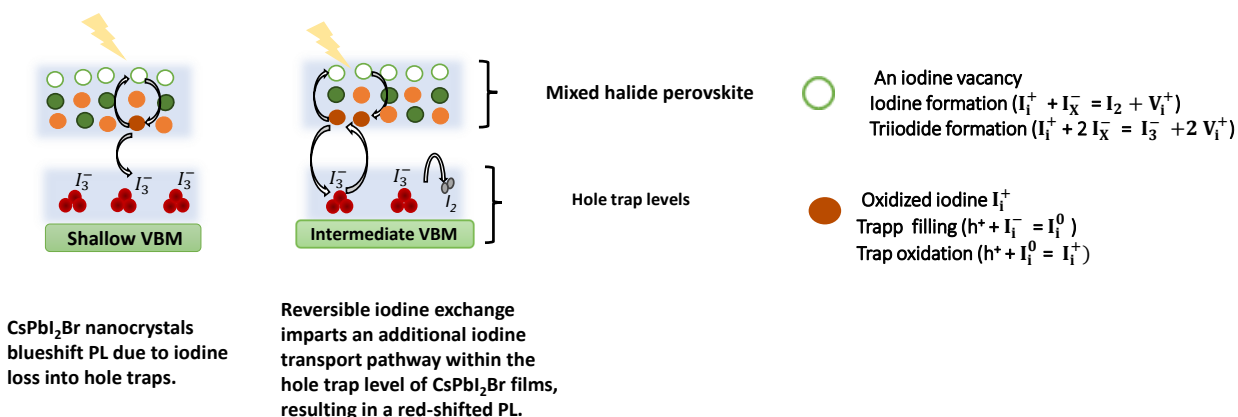

**Figure S4.** Schematic illustrating the photoinduced halide oxidation mechanism of mixed halide perovskites in the form of CsPbI<sub>2</sub>Br nanocrystals and CsPbI<sub>2</sub>Br thin films.

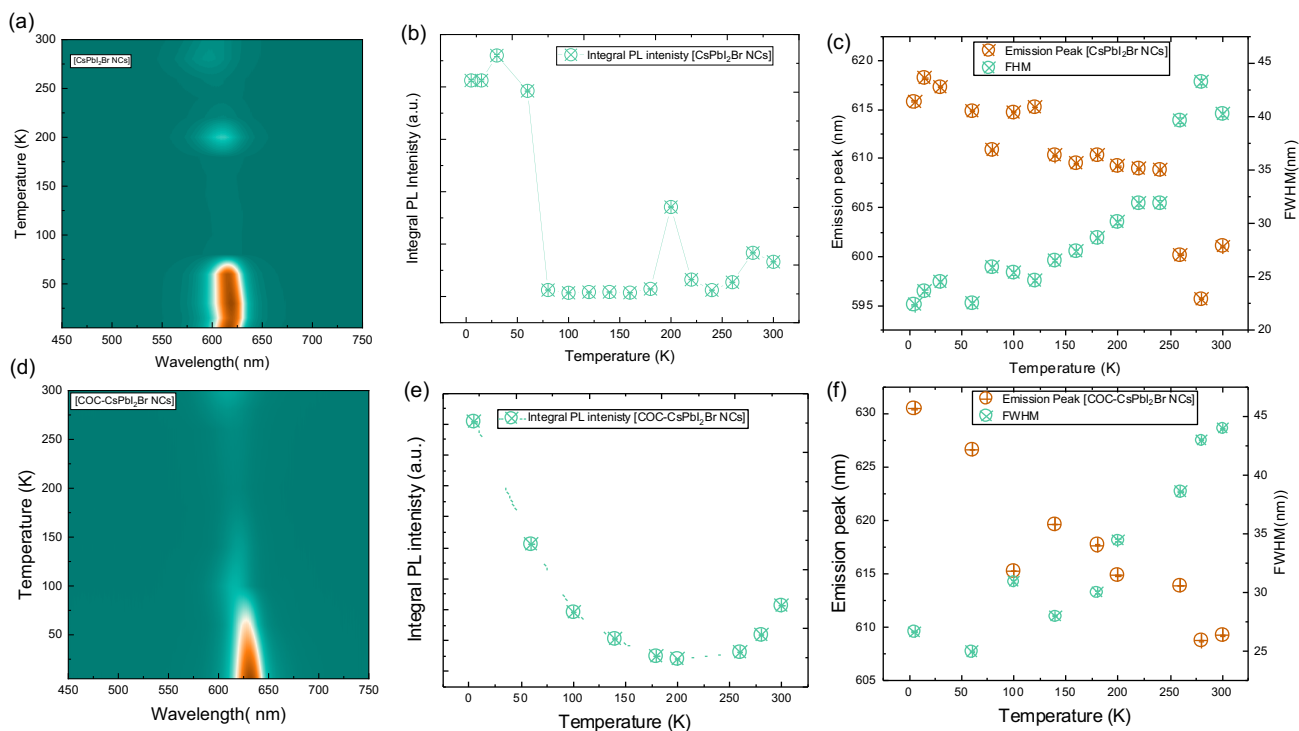

**Figure S5.** Temperature dependent photoluminescence of CsPbI<sub>2</sub>Br nanocrystals and their COC-encapsulated counterparts (a-d) The PL spectra of a 2D -colour plot of the CsPbI<sub>2</sub>Br NCs and encapsulated counterparts at temperatures ranging from 5 to 297 K. (b-e) The integrated PL intensity as a function of temperature for CsPbI<sub>2</sub>Br nanocrystals and COC-encapsulated CsPbI<sub>2</sub>Br (d-e)The emission peak and FWHM as a function of temperature for nanocrystals and COC-encapsulated CsPbI<sub>2</sub>Br, respectively.

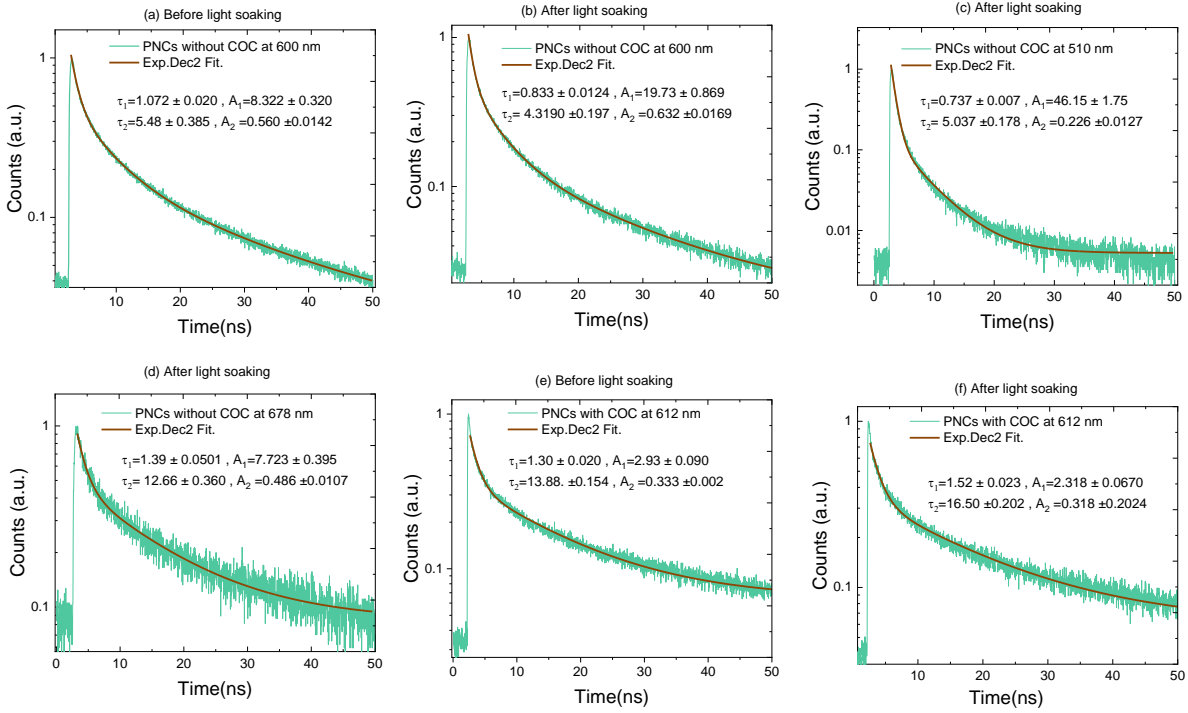

**Figure S6.** Time decay parameters of CsPbI<sub>2</sub>Br nanocrystals and their COC-encapsulated counterparts before and after 50 minutes of a blue light illumination at a wavelength of 450 nm at a laser repetition rate of 7.8 MHz for PNC with COC and 16 MHz for PNCs without COC, respectively. The fitted TRPL decay parameters were extracted using the equation:

$$f(t) = A_1 \exp(-t/\tau_1) + A_2 \exp(-t/\tau_2) + y_0,$$

Where  $\tau_1$  refers to short-lived PL emission, and  $\tau_2$  represent the long-lived lifetime

## References

1. Akriti *et al.* Layer-by-layer anionic diffusion in two-dimensional halide perovskite vertical heterostructures. *Nat. Nanotechnol.* **16**, 584–591 (2021).
2. Chen, Q. *et al.* Controllable self-induced passivation of hybrid lead iodide perovskites toward high performance solar cells. *Nano letters* **14**, 4158–4163 (2014).
3. Kerner, R. A., Xu, Z., Larson, B. W. & Rand, B. P. The role of halide oxidation in perovskite halide phase separation. *Joule* **5**, 2273–2295 (2021).
4. Alanazi, M. *et al.* Stability of mixed lead halide perovskite films encapsulated in cyclic olefin copolymer at room and cryogenic temperatures. *The J. Phys. Chem. Lett.* **14**, 11333–11341 (2023).
5. Brennan, M. C. *et al.* Photolysis of mixed halide perovskite nanocrystals. *ACS Energy Lett.* **8**, 2150–2158 (2023).
6. Scharf, E. *et al.* Ligands mediate anion exchange between colloidal lead-halide perovskite nanocrystals. *Nano Lett.* **22**, 4340–4346 (2022).
7. Dawood, R., Forty, A. & Tubbs, M. The photodecomposition of lead iodide. *Proc. Royal Soc. London. Ser. A. Math. Phys. Sci.* **284**, 272–288 (1965).

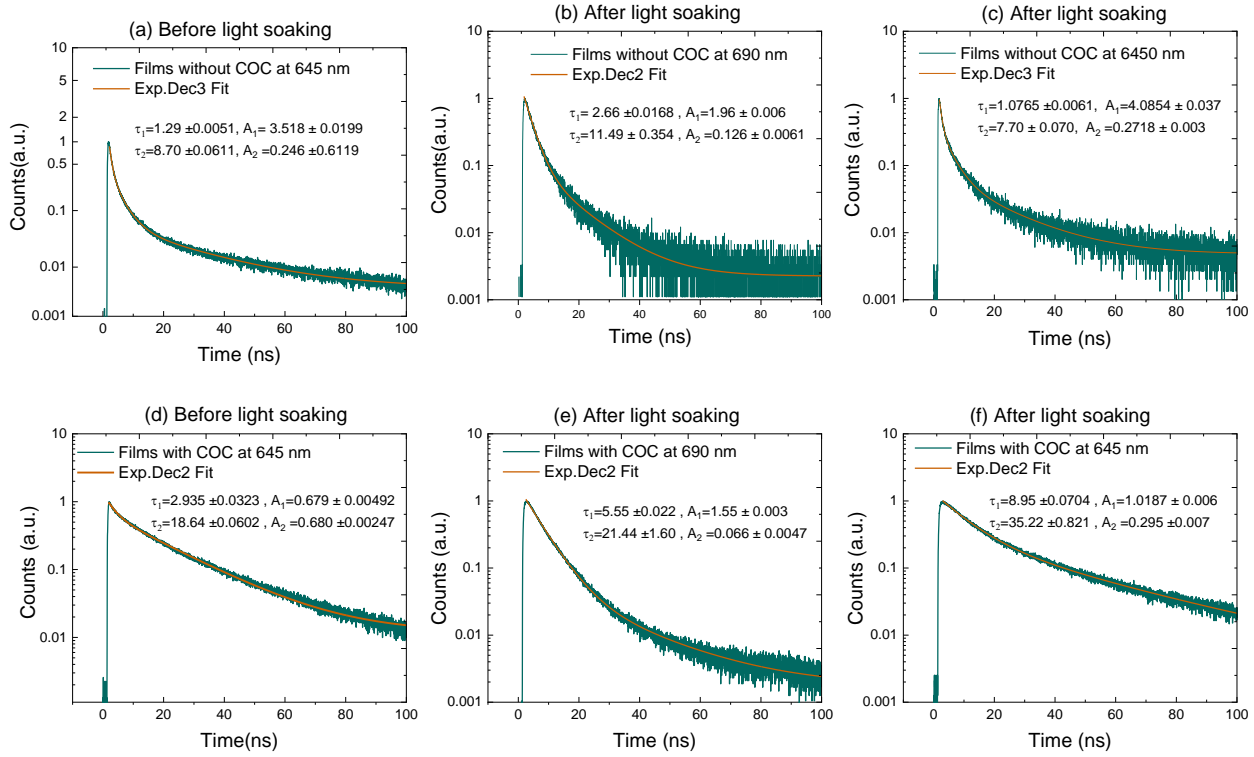

**Figure S7.** Time decay parameters of CsPbI<sub>2</sub>Br thin films and their COC-encapsulated counterparts before and after 50 minutes of a blue light of illumination at a wavelength of 450 nm and a 8.3 MHz laser repetition rate. The fitted TRPL decay parameters were extracted using the equation:

$$f(t) = A_1 \exp(-t/\tau_1) + A_2 \exp(-t/\tau_2) + y_0,$$

Where  $\tau_1$  refers to short-lived PL emission, and  $\tau_2$  represent the long-lived lifetime
